# Supplementary material for: A cocatalyst-free Eosin Y-sensitized p-type of Co3O4 quantum dot for highly efficient and stable visible-light-driven water reduction and hydrogen production
Source: Royal Society of Chemistry journal article supplement (doi:10.1039/c5cp02983j), 2015-01-01
Supplement: c5cp02983j1.pdf [file c5cp02983j1.pdf]

## Electronic Supplementary Material

### A Cocatalyst-Free Eosin Y-Sensitized P-type $\text{Co}_3\text{O}_4$ Quantum Dots for Highly Efficient and Stable Visible-Light-Driven Water Reduction and Hydrogen Production†

Ning Zhang,<sup>a</sup> Jinwen Shi,<sup>a</sup> Fujun Niu,<sup>a</sup> Jian Wang<sup>a</sup> and Liejin Guo<sup>\*a</sup>

<sup>a</sup> International Research Center for Renewable Energy (IRCRE), State Key Laboratory of Multiphase Flow in Power Engineering (MFPE), Xi'an Jiaotong University (XJTU), 28 West Xianning Road, Xi'an, Shaanxi 710049, P. R. China. E-mail: lj-guo@mail.xjtu.edu.cn

#### Experimental Section

**Fig. S1** The process of EY sensitization.

**Fig. S2** PXRD spectra of  $\text{Co}_3\text{O}_4$  QDs/EY and  $\text{Co}_3\text{O}_4$  QDs.

**Fig. S3** (a) Survey scan XPS spectra and (b) high-resolution XPS spectra in Co 2p of  $\text{Co}_3\text{O}_4$  QDs/EY and  $\text{Co}_3\text{O}_4$  QDs.

**Fig. S4** TEM and HRTEM images of (a)  $\text{Co}_3\text{O}_4$  QDs and (b)  $\text{Co}_3\text{O}_4$  QDs/EY.

**Fig. S5** FTIR spectra of Eosin Y,  $\text{Co}_3\text{O}_4$  QDs/EY, dodecanol and  $\text{Co}_3\text{O}_4$  QDs. (C:  $\text{Co}_3\text{O}_4$ , D: dodecanol, E: EY).

**Fig. S6** Comparison of the PL decay curves for Eosin Y,  $\text{Co}_3\text{O}_4$  QDs/EY.

## Experimental Section

*Materials:* The reagents, including dodecanol, n-butanol, ethanol, cobalt nitrate hexahydrate ( $\text{Co}(\text{NO}_3)_2 \cdot 6\text{H}_2\text{O}$ ), Eosin Y, triethanolamine (TEOA), hydrochloric acid (HCl) and sodium hydroxide (NaOH), were commercially available (Sinopharm Chemical Reagent Co., Ltd., analytical grade) and used without further purification. P25  $\text{TiO}_2$  was purchased from Degussa Pacific Ltd. (Shanghai Office) and used without further purification.

*Synthesis of the photocatalysts:*  $\text{Co}_3\text{O}_4$  QDs were prepared via a facile reverse micelle method with microwave-assisted solvothermal process according to ref<sup>1</sup>. As-prepared  $\text{Co}_3\text{O}_4$  QDs were washed with ethanol in an ultrasonic bath and separated out by centrifugation for three cycles and then dried in vacuum at 80°C for 3 h. The mechanism of coating process of EY on  $\text{Co}_3\text{O}_4$  QDs is illustrated in Fig. S1. Because the surface of the solid product was coated by a little dodecanol, the solid product performed hydrophobic. To remove dodecanol and coat EY on the surface of  $\text{Co}_3\text{O}_4$  QDs, 5 mg solid product was mixed into 100 mL EY/TEOA/water solution under vigorous stirring and then ultrasonic dispersed for 30 min. In this process, dodecanol molecules coating on the surface of QDs would be replaced by EY molecules. After that, a separatory funnel was used to remove dodecanol floating on the top of solution, and the remained liquid was our liquid product which was used for photocatalysis directly. For comparison,  $\text{Co}_3\text{O}_4$  QDs and commercial P25  $\text{TiO}_2$  with the weight of 5 mg were dispersed in EY/water solution and EY/TEOA/water solution according to the same method above, respectively, which was all used for photocatalysis directly.

*Characterization of samples:* Crystal structures and phase composition of the samples were determined by using a powder X-ray diffractometer (X'Pert PRO MPD, PANalytical, the Netherlands) with ( $\theta/2\theta$ ) Bragg–Brentano geometry. The powder X-ray diffraction (PXRD) patterns were collected in the range  $2\theta=20\text{--}70^\circ$  (40 kV, 40 mA; Cu K $\alpha$  radiation,  $\lambda=1.541874\text{\AA}$ ; Ni filter; realtime multiple strip (RTMS) detector, X'Celerator). Before PXRD test, the EY-sensitized Co<sub>3</sub>O<sub>4</sub> QDs sample was washed using water and dried at 80°C in vacuum (this sample was also used for X-ray photoelectron spectroscopy and transmission electron microscopy). Surface chemical components and states of the products were studied using an X-ray photoelectron spectrometer (AXIS Ultra DLD, Shimadzu/Kratos Analytical, Japan) with monochromatic Al K $\alpha$  radiation (150 W, 15 kV, 1486.6 eV) and with pressure under high vacuum ( $< 3\times 10^{-9}$  Torr). Binding energies of X-ray photoelectron spectroscopy (XPS) were calibrated relative to the C 1s peak (284.8 eV) from hydrocarbons adsorbed on the surface of samples. Particle size and morphology were confirmed by a transmission electron microscope that was operated at 300 kV (Tecnai G2 F30, FEI, USA). Samples for transmission electron microscopy (TEM) and high-resolution transmission electron microscopy (HRTEM) analysis were ultrasonically dispersed in water, and then, by dipping and drying process, were deposited on copper grids, which were coated with holey or lacey amorphous carbon support films. The microstructures of samples were investigated by using a Fourier transform infrared spectrometer (FTIR: Vextex 70, Bruker, Germany) under transmittance mode. UV-Vis spectra of the photocatalysts were measured on a spectrophotometer (UV4100,

HITACHI, Japan) employing a labsphere diffuse reflectance accessory. The analysis of photoluminescence (PL) spectra were carried out at room temperature using a fluorescence spectrophotometer (QuantaMaster 40, PTI, Canada). The excitation wavelength was 420 nm.

*Evaluation of photocatalytic activities:* The photocatalytic hydrogen production experiments were performed in a 130 mL Pyrex glass cell, which had a flat, round side-window for external light incidence. A 300 W Xe arc lamp (PLS-SXE300, Beijing Trusttech Technology Co., Ltd, China) with a UV cut-off filter ( $\lambda \geq 420$  nm) was used as the light source. Temperature of the system during photocatalytic reaction was maintained by thermostatic circulating water at around 30°C. Hydrogen gas was detected with a gas chromatograph (GC, SP-2100, Beijing Beifen-Ruili Analytical Instrument (Group) Co., Ltd, China), which was equipped with a thermal conductivity detector (TCD), TDX-01 column, and Ar carrier gas. The average intensity of incident light was measured with a spectroradiometer (AvaSpec-2048-USB2, Avantes, Netherland) and equal to 300 mW cm<sup>-2</sup>, and the irradiated area was 3.14 cm<sup>2</sup>. The reaction solution was prepared by the method above. The pH values of the reaction solution were adjusted by addition of 1 M HCl or NaOH. Before each experiment, the suspension was purged with nitrogen for 15 min to remove air.

The method for measuring apparent quantum yield (A.Q.Y.) was the same as those described in ref<sup>2</sup>. The A.Q.Y. was calculated with the following equation.

$$\begin{aligned} \text{A.Q.Y.(\%)} &= \frac{\text{number of reacted electrons}}{\text{number of incident photons}} \times 100 \\ &= \frac{\text{number of evolved H}_2 \text{ molecules} \times 2}{\text{number of incident photons}} \times 100 \end{aligned}$$

The conversion efficiency of solar energy to hydrogen energy was measured in air at room temperature and under 100 mW/cm<sup>2</sup> illumination in a solar simulator with an AM1.5 global filter. The conversion efficiency of solar energy to hydrogen energy was calculated with the following equation.

$$\eta_c = \frac{\Delta G_{H_2}^0 R_{H_2}}{w_s A} \times 100\%$$

Where  $\eta_c$  is the conversion efficiency of solar energy to hydrogen energy,  $\Delta G_{H_2}^0$  is the Gibbs free energy of hydrogen, which equal to 237.20 kJ/mol in standard condition,  $R_{H_2}$  is the rate of H<sub>2</sub> production,  $w_s$  is the irradiation intensity of incoming light, and  $A$  is the irradiation area.

*Electrochemical Measurements:* Electrochemical measurements were carried out on a potentiostat (273A, Princeton Applied Research Company, USA) in a three electrodes cell system with a large area platinum plate as counter electrode and a Ag/AgCl electrode as reference electrode. The films as work electrodes were prepared by the drying and calcination method. A clean FTO was put into a beaker contained colloidal solution of Co<sub>3</sub>O<sub>4</sub> QDs or TiO<sub>2</sub>, and then solvent was dried at 80°C in air. The as-prepared Co<sub>3</sub>O<sub>4</sub> QDs or TiO<sub>2</sub>-coated FTO was calcined at 400°C for 5 min, and then used for electrochemical measurements. An aqueous solution of 0.1 M Na<sub>2</sub>SO<sub>4</sub> was used as electrolyte. The area of the work electrodes was fixed at 0.785 cm<sup>2</sup>.

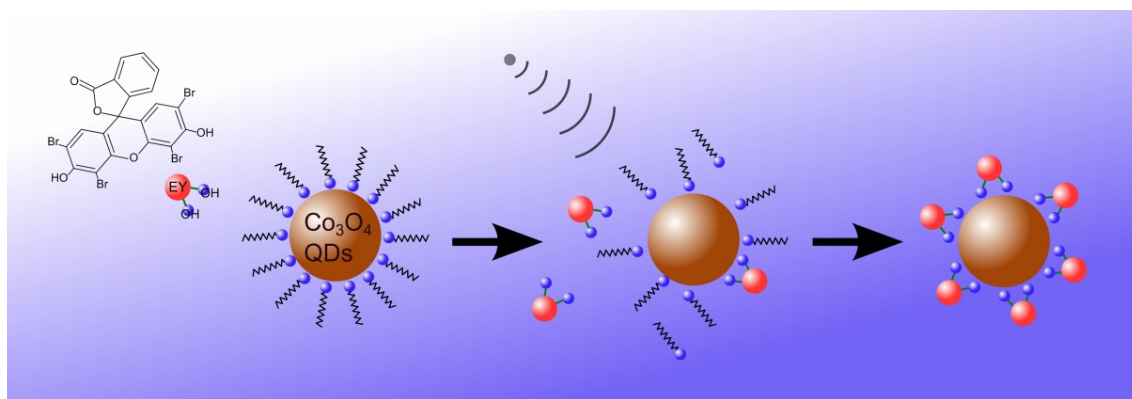

**Fig. S1** The process of EY sensitization.

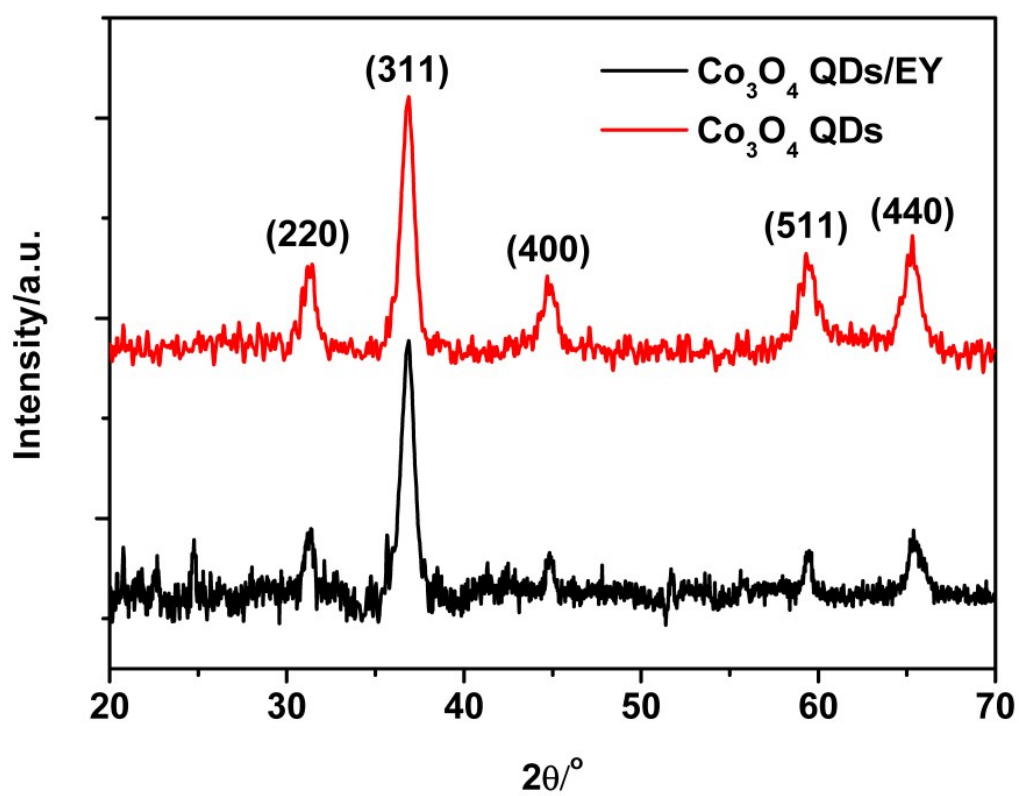

**Fig. S2** PXRD spectra of  $\text{Co}_3\text{O}_4$  QDs/EY and  $\text{Co}_3\text{O}_4$  QDs.

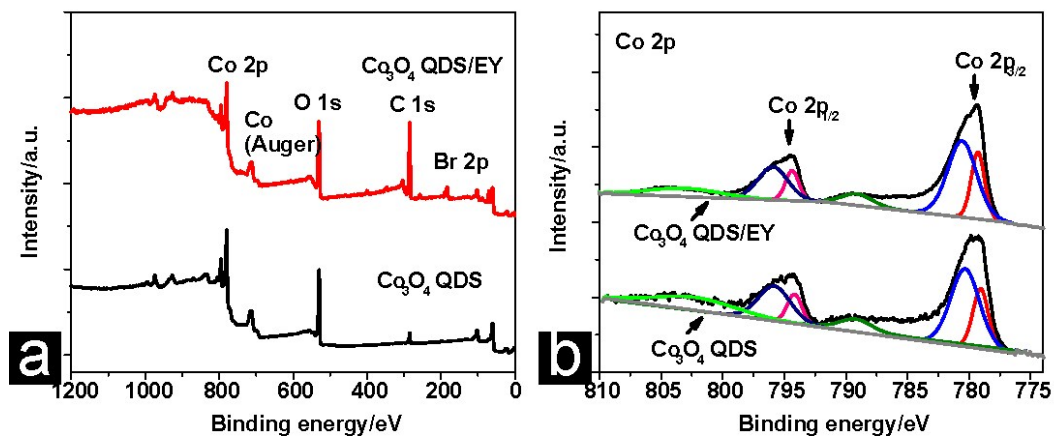

**Fig. S3** (a) Survey scan XPS spectra and (b) high-resolution XPS spectra in Co 2p of Co<sub>3</sub>O<sub>4</sub> QDs/EY and Co<sub>3</sub>O<sub>4</sub> QDs.

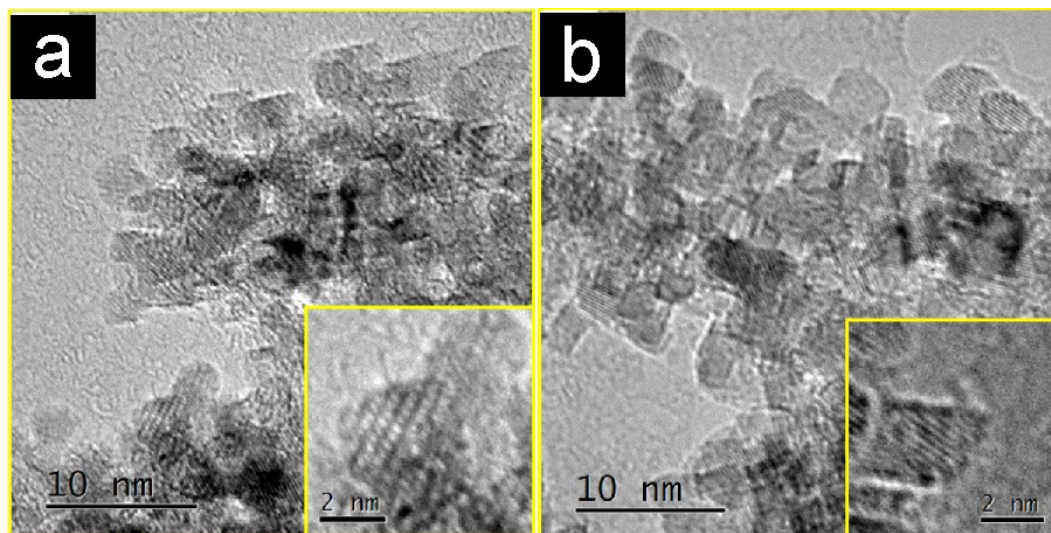

**Fig. S4** TEM and HRTEM images of (a) Co<sub>3</sub>O<sub>4</sub> QDs and (b) Co<sub>3</sub>O<sub>4</sub> QDs/EY.

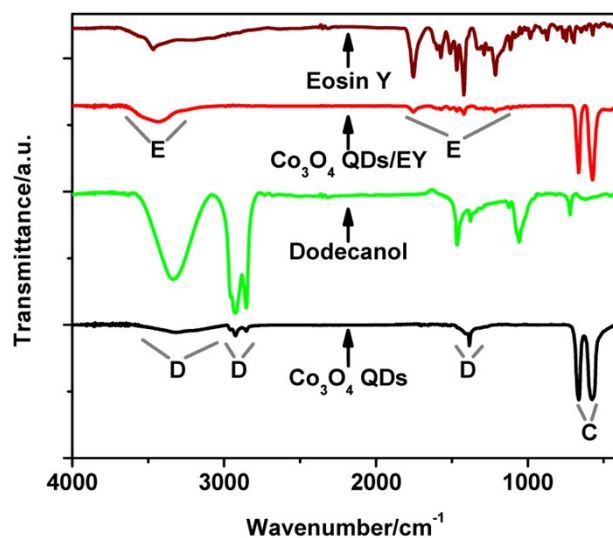

**Fig. S5** FTIR spectra of Eosin Y,  $\text{Co}_3\text{O}_4$  QDs/EY, dodecanol and  $\text{Co}_3\text{O}_4$  QDs. (C:  $\text{Co}_3\text{O}_4$ , D: dodecanol, E: EY) .

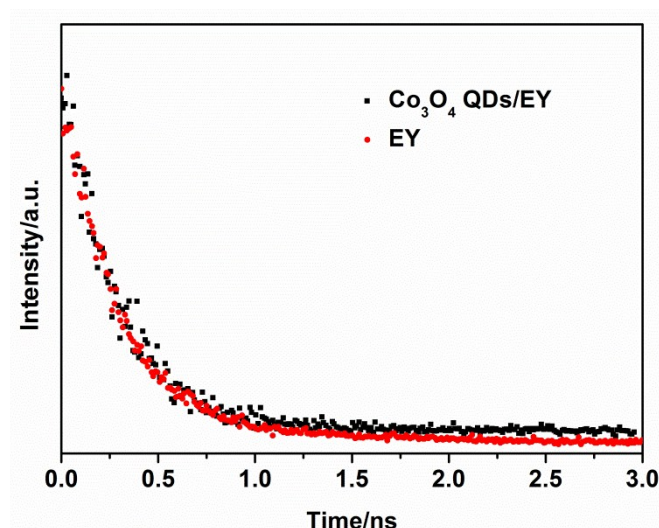

**Fig. S6** Comparison of the PL decay curves for Eosin Y,  $\text{Co}_3\text{O}_4$  QDs/EY.

Excitation wavelength was 337 nm. Test conditions: pH and the concentration of TEOA and EY in each system were 10.95, 0.29 M and 0.01 mM, respectively. The weight concentration of  $\text{Co}_3\text{O}_4$  QDs was  $0.01 \text{ mg mL}^{-1}$  in  $\text{Co}_3\text{O}_4$  QDs/EY system.

## Notes and references

1. N. Zhang, J. Shi, S. S. Mao and L. Guo, *Chem. Commun.*, 2014, **50**, 2002-2004.
2. D. Jing and L. Guo, *Journal of Physical Chemistry B*, 2006, **110**, 11139-11145.
